1 **Title**

2 **Inhibition of Mul1-mediated ubiquitination promotes mitochondria-associated translation**

3

4 **Authors**

5 Yuan Gao<sup>1</sup>, Maria Dafne Cardamone<sup>1</sup>, Julian Kwan<sup>1,2</sup>, Joseph Orofino<sup>1</sup>, Ryan Hekman<sup>1,2</sup>, Shawn  
6 Lyons<sup>1</sup>, Andrew Emili<sup>1,2,3</sup>, Valentina Perissi<sup>1,4</sup>

7

8 <sup>1</sup> Biochemistry Department, Boston University School of Medicine, Boston, MA 02115

9 <sup>2</sup> Center for Network and Systems Biology, Boston University, Boston, MA 02115

10 <sup>3</sup> Biology Department, Boston University, Boston, MA 02115

11 <sup>4</sup> Corresponding Author

12

13

14

15 **Keywords**

16 *Ubiquitin, GPS2, mitochondria, PABPC, Mul1, mitochondria stress response (MSR)*

17

18

19 **Running title**

20 *Regulation of mitochondria-associated translation by GPS2*

21

22

23 **ABSTRACT**

24 **G-Protein Pathway Suppressor 2 (GPS2) was recently identified as an endogenous**  
25 **inhibitor of non-proteolytic ubiquitination mediated by the E2 ubiquitin-conjugating**  
26 **enzyme Ubc13. GPS2-mediated restriction of K63 ubiquitination is associated with the**  
27 **regulation of insulin signaling, inflammation and mitochondria-nuclear communication,**  
28 **however a detailed understanding of the targets of GPS2/Ubc13 activity is currently**  
29 **lacking, Here, we have dissected the GPS2-regulated K63 ubiquitome in mouse embryonic**  
30 **fibroblasts and human breast cancer cells, unexpectedly finding an enrichment for**  
31 **proteins involved in RNA binding and translation. Characterization of putative targets,**  
32 **including the RNA-binding protein PABPC1 and translation factor eiF3m, revealed a**  
33 **strategy for regulating the mitochondria-associated translation of selected mRNAs via**  
34 **Mul1-mediated ubiquitination. Our data indicate that removal of GPS2-mediated inhibition,**  
35 **either via genetic deletion or stress-induced nuclear translocation, promotes the**  
36 **ubiquitination of mitochondria-associated translation factors leading to increased**  
37 **expression of an adaptive antioxidant program. In light of GPS2 role in nuclear-**  
38 **mitochondria communication, these findings reveal an exquisite regulatory network for**  
39 **modulating mitochondrial gene expression through spatially coordinated transcription**  
40 **and translation.**

41

42

43

## 44 INTRODUCTION

45 Maintenance of mitochondria metabolism and energy homeostasis is guaranteed by a constant  
46 turnover of the mitochondrial network, including both generation of new mitochondria, remodeling  
47 of existing mitochondria and removal of damaged organelles<sup>1</sup>. Mitochondria biogenesis and  
48 rewiring of mitochondrial functions require coordinated gene expression from the mitochondrial  
49 and nuclear genomes<sup>2-5</sup>. This is achieved through energy-sensing signaling pathways impacting  
50 on the transcriptional network controlling the expression of nuclear-encoded mitochondrial genes,  
51 and via shuttling of transcription factors and cofactors between the two organelles<sup>6-9</sup>. In yeast,  
52 balanced expression of different OXPHOS subunits is also facilitated by synchronized control of  
53 mitochondrial and cytosolic translation<sup>2,10-13</sup>, suggesting that coordinated regulation of multiple  
54 levels of gene expression may be required for the maintenance of mitochondrial homeostasis.  
55 However, the molecular mechanisms promoting balanced mitochondrial gene expression and  
56 specific mRNA processing and translation at the level of single organelles in mammals are not  
57 yet fully understood. Recent studies have identified RNA-binding proteins responsible for  
58 recruiting selected mRNAs to the mitochondrial outer membrane surface<sup>14-23</sup>, providing some  
59 clues to the specificity of translation on mitochondria-associated ribosomes as compared to  
60 cytosolic ribosomes. However a complete understanding of the modes of regulation of  
61 mitochondria-associated translation is currently lacking.

62 Ubiquitination is a reversible protein post-translational modification that is achieved through the  
63 sequential actions of several classes of enzymes, including a ubiquitin (Ub)-activating enzyme  
64 (E1), a Ub-conjugating enzyme (E2), and a Ub ligase (E3), that work together to mediate the  
65 attachment of one or multiple ubiquitin moieties to lysine residues on target proteins<sup>24,25</sup>. In the  
66 case of poly-ubiquitination, chains of different topology can either promote protein degradation or  
67 serve, as in the case of other post-translational modifications, to influence protein functions and  
68 interactions<sup>26,27</sup>. Among others, K48-linked ubiquitin chains are best known as markers for

69 proteasomal degradation, whereas K63-linked ubiquitin chains are non-proteolytic<sup>28,29</sup> and are  
70 associated with immune signaling, DNA damage repair, protein sorting, and translation<sup>30–37</sup>.  
71 Moreover, more recent studies point to a broader role in regulating cellular metabolism and  
72 adaptive responses to stress<sup>38–43</sup>. Notably, K63-linked ubiquitin mediates translational regulation  
73 in yeast exposed to oxidative stress<sup>39,42</sup>.

74 We recently identified GPS2 as an inhibitor of K63 ubiquitination synthesized by the E2  
75 conjugating enzyme Ubc13<sup>44</sup>. GPS2-mediated inhibition of K63 ubiquitination is essential for  
76 promoting several coordinated functions across the cell, including the transcriptional regulation of  
77 mitochondrial genes in the nucleus and activating insulin signaling and pro-inflammatory  
78 pathways in the cytosol<sup>9,44–47</sup>. These complementary activities across different subcellular  
79 compartments are facilitated by GPS2 translocation between organelles, making GPS2 an  
80 excellent candidate for mediating the coordination of nuclear and extranuclear processes  
81 contributing to the remodeling of cellular metabolism. Regulated mitochondria-to-nucleus  
82 shuttling of GPS2, for example, controls mitochondria biogenesis via transcriptional activation of  
83 nuclear-encoded mitochondrial genes<sup>9</sup>. Acting as a mediator of mitochondria retrograde  
84 signaling, GPS2 is also required for licensing the expression of stress response genes upon  
85 mitochondria depolarization<sup>9</sup>. Upon translocation to the nucleus, GPS2-mediated inhibition of K63  
86 ubiquitination impacts the remodeling of the chromatin environment of target gene promoters by  
87 stabilizing histone demethylases<sup>9</sup>. At the same time, its removal from the outer mitochondrial  
88 membrane may release the ubiquitination of other targets, which are currently unknown. Here,  
89 we have profiled the GPS2-regulated ubiquitome and dissected the role of GPS2-regulated K63  
90 ubiquitination in modulating mitochondria-associated protein translation. Our results point to a  
91 novel regulatory strategy whereby GPS2 provides a unifying strategy for coordinating the  
92 transcriptional and translational control of mitochondrial gene expression by inhibiting K63  
93 ubiquitination of key targets by the mitochondrial ubiquitin ligase Mul1.

94

## 95 RESULTS

### 96 Remodeling of the mitochondrial proteome in the absence of GPS2

97 Our previous work has identified GPS2 as a regulator of mitochondrial gene expression,  
98 through transcriptional control of nuclear-encoded mitochondrial (neMITO) genes, and as a  
99 mediator of mitochondria-to-nucleus retrograde signaling<sup>9</sup>. To further dissect the role of GPS2 in  
100 regulating mitochondrial functions, we profiled the mitochondrial proteome and transcriptome of  
101 immortalized mouse embryonic stem cells (MEFs) derived from either GPS2<sup>fl/fl</sup>/Ubc<sup>ERT2</sup>-Cre<sup>+</sup> or  
102 GPS2<sup>fl/fl</sup>/Ubc<sup>ERT2</sup>-Cre<sup>-</sup> mice. Upon Tamoxifen treatment, GPS2 deletion is induced in Ubc<sup>ERT2</sup>-Cre<sup>+</sup>  
103 cells (from here on called GPS2-KO), whereas Ubc<sup>ERT2</sup>-Cre<sup>-</sup> (from here on called WT) serve as  
104 negative control (**Supplemental Figure S1A**). In agreement with previous studies in other cell  
105 models, GPS2-KO MEFs present with severely reduced mitochondrial content compared to WT  
106 cells (**Supplemental Figure S1B**).

107 To achieve a comprehensive characterization of the changes associated with GPS2  
108 deletion, we first profiled mitochondrial extracts from WT and KOMEFs using quantitative tandem  
109 mass tag (TMT) labeling followed by quantification via mass spectrometry (LC-MS/MS). We  
110 identified 891 differentially expressed proteins across three replicates (**Supplementary Table 1**,  
111 P-value <0.05 and LogFC>0.25). In accord with our previous findings in adipocytes and breast  
112 cancer cells<sup>44,46,47</sup>, upregulated proteins were enriched for pathways previously found to be  
113 regulated by cytosolic GPS2, including EGFR/Insulin signaling, inflammatory responses, and  
114 TNFalpha/MAPK signaling (**Supplemental Table 1** and **Figure S1C**). Downregulated proteins,  
115 instead, spanned various mitochondrial functions, including Electron Transport Chain (ETC), fatty  
116 acid oxidation, TCA cycle, and amino acid metabolism (**Supplemental Table 1** and **Figure S1C**).  
117 Accordingly, filtered analysis of intrinsic mitochondrial proteins, based on the latest MitoCarta 3.0  
118 database, indicated that the majority of differentially expressed mitochondrial proteins are

119 downregulated in GPS2-KO cells, as expected based on previous studies (**Figure 1A**)<sup>9</sup>. However,  
120 we also identified a small subset of mitochondrial proteins upregulated in the absence of GPS2.  
121 Interestingly, the upregulated program was enriched in proteins involved in antioxidant response  
122 and programmed cell death (**Figure 1A**), which suggests adaptive changes in response to the  
123 stress of GPS2 deletion. Upregulation of anti-oxidative protective proteins SOD2 and PRDX2,  
124 fatty acid synthase FASN, and downregulation of pyruvate dehydrogenase PDHA and OXPHOS  
125 proteins was confirmed by western blotting of mitochondrial extracts from GPS2 WT and KO  
126 MEFs (**Figure 1B**).

127  
128 To characterize the molecular mechanisms underlying the adaptive regulation of  
129 mitochondrial gene expression in the absence of GPS2, we profiled mitochondria-associated RNA  
130 from WT and GPS2-KO MEFs by RNA-seq. Among the differentially expressed genes (DEGs)  
131 (**Supplementary Table 2**), we identified 316 mitochondrial genes consistently regulated across  
132 three independent replicates, including 138 upregulated and 178 downregulated genes. Overlay  
133 of the RNA-seq results over the proteomics data confirmed that the downregulation of  
134 mitochondrial proteins observed in GPS2-KO cells is largely associated with reduced mRNA  
135 levels (**Figure 1C**), as expected based on GPS2 acting as a required transcriptional cofactor for  
136 the activation of neMITO genes<sup>9</sup>. Indeed, overlay of the MEFs proteomics data over GRO-seq  
137 data previously generated in 3T3-L1 cells with acute GPS2 downregulation further indicates that  
138 protein downregulation likely results from defective transcription (**Figure 1D**)<sup>9</sup>. Mitochondrial  
139 proteins upregulated in GPS2-KO cells instead included genes presenting both increased (59%,  
140 depicted in red in **Figure 1C**) or decreased (35%, depicted in blue in **Figure 1C**) mRNA  
141 abundance in KO versus WT cells. However, a comparison of protein and nascent RNA  
142 expression suggests that the transcription of the majority of proteins differentially regulated in  
143 MEFs, including both up- and down-regulated genes, is impaired in the absence of GPS2 (**Figure**  
144 **1D**). This suggests that multiple levels of regulation may be contributing to the remodeling of the

145 mitochondrial proteome of GPS2-KO cells, including both transcriptional repression and post-  
146 transcriptional regulation of mRNA stability and/or protein synthesis, with the outcome for different  
147 gene/protein sets depending on the overlay of these complementary regulatory strategies.

#### 148 *GPS2 restricts K63 ubiquitination of mitochondrial proteins*

149 To further our understanding of the adaptive rewiring of the mitochondrial proteome in  
150 GPS2-null cells, we decided to investigate the mechanism/s responsible for post-transcriptional  
151 regulation of mitochondrial gene expression in the absence of GPS2. Because our previous work  
152 indicates that GPS2 exerts its functions across different subcellular compartments via inhibition  
153 of the ubiquitin-conjugating enzyme Ubc13<sup>9,44-48</sup>, we focused on K63 ubiquitination as a possible  
154 regulatory mechanism. First, we asked whether loss of GPS2 leads to unrestricted K63  
155 ubiquitination activity on mitochondria. Indeed, we observed increased accumulation of K63  
156 ubiquitin chains in mitochondrial extract from GPS2 KO cells compared to the WT line by western  
157 blot analysis (**Figure 2A**). To identify putative targets of GPS2-mediated regulation, we then  
158 profiled the K63 ubiquitome of GPS2 WT and KO MEFs by LC-MS/MS. Relative quantification  
159 was performed by stable isotope labeling of amino acid in cell culture (SILAC) (**Figure 2B**), with  
160 K63 ubiquitinated proteins being enriched prior to mass spectrometry through selective binding  
161 to the high-affinity lysine-63-poly-ubiquitin binding domain Vx3K0<sup>49</sup> (**Supplemental Figure 2A**  
162 **and 2B**). This approach led to the identification of 73 candidate targets, among 230 differentially  
163 enriched proteins, for which the increase in the H/L ratio indicated increased ubiquitination and/or  
164 increased interaction with ubiquitinated targets in GPS2-KO cells (**Supplemental Figure 2C** and  
165 **Supplemental Table 3**). Unexpectedly, we found that putative targets of GPS2-mediated  
166 regulation were strongly enriched for factors involved in protein translation (**Figure 2C**), whereas  
167 no significant overlap with known targets of K63 ubiquitination by Parkin was observed, despite  
168 mitophagy markers being activated in GPS2-KO cells (Supplemental Figure 2D, 2E and  
169 **Supplemental Table 3**). These findings were confirmed when profiling was repeated using TMT

170 labeling instead of SILAC (**Supplemental Figure 2D**). A similar enrichment in proteins involved  
171 in translation and RNA processing was also observed by profiling the K63 ubiquitome of MDA-  
172 MB231 breast cancer cells deleted of GPS2 (REF) (**Supplemental Figure 2E** and **Supplemental**  
173 **Table 3**). Moreover, the increased ubiquitination of representative translation factors RPS11 and  
174 RACK1 - both previously reported as direct targets of non-proteolytic ubiquitination (REFs) - was  
175 confirmed by IP/WB using both whole-cell extracts and fractionated mitochondrial extracts  
176 (**Figure 2D**). This indicates that lack of GPS2 promotes exacerbated ubiquitination of translation  
177 factors associated with mitochondria, thus suggesting that GPS2-mediated inhibition of K63  
178 ubiquitination might regulate mitochondria-associated protein translation.

179  
180 To investigate whether protein translation is regulated in absence of GPS2, we compared  
181 the rate of protein translation in WT and KO cells by monitoring the incorporation of puromycin  
182 into newly synthesized proteins across subcellular compartments. A significant increase in  
183 puromycin incorporation was observed in mitochondria from GPS2-KO cells compared to WT  
184 (**Figure 2E**). Pre-treatment of cells with the translation initiation inhibitor homoharringtonine  
185 (HHT)<sup>50</sup> reduced puromycin incorporation in both WT and KO mitochondria, indicative of active  
186 translation. Remarkably, the increase in puromycin incorporation was specific to the mitochondrial  
187 compartment, with no significant changes observed in nuclear and cytosolic extracts (**Figure 2E**).  
188 Together, these results indicate that the rate of protein translation in mitochondrial extracts is  
189 specifically upregulated in absence of GPS2. Based on previous studies indicating that this  
190 approach allows for selective measurement of translation of nuclear-encoded mitochondrial  
191 proteins occurring on the outer mitochondrial membrane (OMM) as compared to the translation  
192 of mitochondria-encoded genes<sup>51</sup>, we concluded that mitochondria-associated translation of  
193 neMITO genes increases in absence of GPS2. This suggests a localized regulatory strategy  
194 impacting mRNAs translated by ribosomes docked on the mitochondria rather than free cytosolic  
195 ribosomes. In accord with this hypothesis, we observed that transcripts encoding for more than



196 half of the upregulated proteins in GPS2-KO cells are recruited to the outer mitochondrial  
197 membrane for import-coupled translation via interaction with the AKAP1/MDI/LARP  
198 complex<sup>18,52</sup>(**Supplementary Table 1**). Conversely, no significant overlap was observed between  
199 upregulated proteins in the absence of GPS2 and transcripts binding to CluH, an RNA binding  
200 protein responsible for the assembly of cytosolic granules promoting the translation of a variety  
201 of mitochondrial proteins<sup>14,15,53</sup>, including several showing reduced transcription in the absence of  
202 GPS2 (**Supplementary Table 1**). Together, these comparative *in silico* analyses suggest that  
203 enhanced translation of mitochondrial proteins in the absence of GPS2 is specific for  
204 mitochondrial transcripts translated by mitochondria-associated ribosomes.

205

#### 206 PABPC1 ubiquitination by Mul1

207 To gain further mechanistic insights into the regulation of mitochondria protein translation via K63  
208 ubiquitination, we focused on the poly-A binding protein PABPC1. PABPC1 is not only a known  
209 target of ubiquitination<sup>54</sup> but also the single putative target of GPS2 regulation identified across  
210 different multiple experimental setups (SILAC and TMT labeling) and different cell types (MEFs  
211 and MDA-MB-231) (**Supplemental Figure 3A**). Two complementary IP/WB approaches  
212 confirmed increased K63 ubiquitination of PABPC1 in the mitochondria of GPS2-KO cells. In the  
213 first assay, we immunoprecipitated K63Ub-containing proteins by binding to the Vx3KO trap and  
214 visualized PABPC1 by WB (**Figure 3A**). In the second, we immunoprecipitated PABPC1 and  
215 visualized associated K63Ub chains by WB (**Figure 3B**). As expected, the increase in high  
216 molecular weight (HMW) Ub chains observed in GPS2-KO cells was reversed by inhibiting the  
217 activity of ubiquitin-conjugating enzyme Ubc13 with the chemical inhibitor NSC697923  
218 (REF)(**Figure 3B**). A Ubc13-dependent increase in PABPC1 ubiquitination was also observed  
219 upon depolarization of mitochondria by FCCP, a condition mimicking GPS2 downregulation  
220 through its relocalization from mitochondria to the nucleus<sup>9</sup>(**Figure 3C**). Unexpectedly, this  
221 experiment revealed that FCCP-induced ubiquitination of PABPC1 depended on the mitochondria

222 specific E3 ligase MUL1 rather than MKRN1, which had been previously associated with PABPC1  
223 ubiquitination in the cytosol (**Figure 3C**). Ubiquitination of PABPC1 by MUL1 and Ubc13, as  
224 recapitulated *in vitro* using bacterially expressed recombinant proteins, was significantly reduced  
225 upon mutagenesis of the previously identified ubiquitination sites (K78, K188, K284, and K512)  
226 (**Figure 3D**) and significantly inhibited by GPS2 (**Figure 3E**). Together these results indicate that  
227 PABPC1 can be locally regulated through different ubiquitination machineries and that GPS2 is  
228 specifically responsible for preventing its ubiquitination by Mul1 on mitochondria.

229 PABPC1 is an RNA-binding protein and a key component of the translation machinery. PABPC1  
230 concomitant interactions with the polyA-containing 3'UTR and 5' Cap-bound components of the  
231 translation initiation complex promote protein translation through closed-loop mRNP  
232 formation<sup>55,56</sup>. To unravel whether loss of GPS2 may be impacting on mitochondria-associated  
233 translation through aberrant PABPC1 ubiquitination, we first asked whether PABPC1 interaction  
234 with the translation initiation complex is altered in the absence of GPS2. Co-immunoprecipitation  
235 experiments indicated that PABPC1 interaction with the translation initiation factor eIF4G and  
236 translational activator PABP-interacting protein 1 (PAIP1) is more robust in mitochondria from  
237 GPS2-KO cell than their WT counterparts (**Figure 3F**). In contrast, interaction with the  
238 translational repressor PABP-interacting protein 2 (PAIP2), which competes with PAIP1 for  
239 interaction with PABP<sup>57</sup>, is significantly decreased (**Figure 3F**). These changes are rescued by  
240 transient downregulation of the E3 ubiquitin ligase MUL1 (**Figure 3G**), indicating that aberrant  
241 ubiquitination of MUL1 target/s in the absence of GPS2-mediated inhibition of Ubc13 activity is  
242 indeed a contributing factor to the observed phenotype. This conclusion was further confirmed by  
243 rescue of enhanced protein translation rate in GPS2-KO MEF cells through MUL1 downregulation  
244 by siRNA, as measured by mitochondrial puromycilation assay (**Figure 3H**).

245 While we have primarily focused on PABPC1 due to its striking identification across multiple  
246 datasets, we also considered the possibility that ubiquitination of additional factors may be  
247 contributing to regulate mitochondria-associated translation. GPS2-regulated K63 ubiquitome

248 included a number of putative targets involved in RNA processing and translation. Among them,  
249 eukaryotic translation initiation factor 3, subunit M (eIF3m), was also confirmed as a direct target  
250 of GPS2/Ubc13/Mul1-mediated regulation (**Supplemental Figure 3B**). Our results together  
251 indicate that GPS2 regulates mitochondria-associated translation by preventing aberrant MUL1-  
252 mediated ubiquitination of translation factors like PABPC1 and eIF3m on the outer mitochondrial  
253 membrane.

254

### 255 *K63ub-mediated regulation of mitochondria-associated translation in stress response*

256 Our previous studies indicate that, in conditions of mitochondrial depolarization, GPS2  
257 translocates to the nucleus for regulating the transcription of stress response genes<sup>9</sup>. This  
258 suggested that removal of GPS2 by translocation could have the indirect effect of releasing Mul1  
259 activity and promoting mitochondrial protein translation as part of the adaptive stress response.  
260 To investigate this possibility, we first assessed the ubiquitination of PABPC1 after depolarization  
261 with FCCP for 10' or 30'. As expected, concomitant to the translocation of GPS2 from  
262 mitochondria to the nucleus (**Figure 4A**), we observed a significant increase in mitochondria-  
263 associated K63 poly-ubiquitination of PABPC1 (**Figure 4B** and **4C**). Under these conditions,  
264 PABPC1 interaction with the translation initiation complex is strengthened (**Figure 4D**). This  
265 correlates with the activation of a gene expression program that, in part, mirrors that identified in  
266 response to GPS2 deletion (**Figure 4E, bottom cluster**), as validated by western blotting for  
267 antioxidant proteins SOD2 (**Figure 4F**). At the same time, activation of a large part of the FCCP-  
268 induced program is impaired in GPS2-KO cells, likely due to reduced transcription in the absence  
269 of nuclear GPS2.

270

## 271 **DISCUSSION**

272

273 Previous studies have characterized GPS2 as a mediator of mitochondria retrograde signaling, a  
274 transcriptional cofactor involved in mediating both gene repression and activation, and an inhibitor  
275 of non-proteolytic K63 ubiquitination. Together, these complementary functions ensure a proper  
276 adaptive response to mitochondrial stress and regulate mitochondria biogenesis during  
277 differentiation, with GSP2 translocating from mitochondria to nucleus to regulate nuclear-encoded  
278 mitochondrial genes transcription via stabilization of chromatin remodeling enzymes<sup>9</sup>. A key  
279 implication of these findings is that restricted K63 ubiquitination in the nucleus indirectly regulates  
280 mitochondrial functions through the expression of stress response and nuclear-encoded  
281 mitochondrial genes. However, it remains unclear whether GPS2 also contributes to the  
282 regulation of mitochondria homeostasis in a direct manner, possibly by modulating the  
283 ubiquitination of mitochondrial proteins. To address this question, we have profiled the GPS2-  
284 regulated K63 ubiquitome in mouse embryonic fibroblasts and human breast cancer cells. To our  
285 surprise, we did not observe any significant overlap between the GPS2-regulated program and  
286 the mitochondrial proteins targeted by Parkin-mediated ubiquitination. This suggests that stress-  
287 induced translocation of GPS2 is unlikely to contribute to removing defective mitochondria via  
288 mitophagy. Instead, GPS2-mediated inhibition of K63 ubiquitination prevalently affects proteins  
289 involved in RNA processing and translation. In particular, our results indicate that GPS2-mediated  
290 inhibition of K63 ubiquitination contributes to regulating the mitochondria-associated translation  
291 of a specific of nuclear-encoded mitochondrial genes. Together with the previous characterization  
292 of nuclear GPS2 as an essential cofactor for the expression of nuclear-encoded mitochondrial  
293 genes, these findings indicate that GPS2-mediated inhibition of K63 ubiquitination represents a  
294 unifying strategy for modulating the expression of mitochondrial proteins through coordinated  
295 transcription and translation events.

296

297 Mitochondrial proteins regulated through this strategy are enriched for factors involved in the  
298 antioxidant response, which is consistent with both the role played by GPS2 in mediating the

299 mitochondrial stress response and the role played by K63 ubiquitination in regulating ribosomal  
300 activity in yeast (REF). Recent studies have identified RNA binding proteins, such as Puf3p in  
301 yeast, Clu and MDI/Larp in flies, CluH and dAKAP1/LARP4 in mammalian cells, that are involved  
302 in the selective regulation of different subsets of nuclear-encoded mitochondrial  
303 proteins<sup>14,17,18,52,58–62</sup>. Mitochondrial proteins upregulated in GPS2-KO cells present a significant  
304 overlap with the AKAP1/MDI/LARP complex targets, which is responsible for recruiting mRNAs  
305 to the outer mitochondrial membrane for import-coupled translation. In contrast, no overlap was  
306 observed with transcripts binding to CLUH, an RNA binding protein responsible for the assembly  
307 of cytosolic granules promoting the cytosolic synthesis of various mitochondrial proteins. These  
308 results suggest that different sets of nuclear-encoded mitochondrial genes might be regulated  
309 through independent strategies, with GPS2-controlled K63 ubiquitination being restricted to the  
310 local regulation of mitochondria-associated translation. This separation is likely to be critical for  
311 ensuring the maintenance of mitochondrial and cellular homeostasis.

312  
313 Mechanistically, our results indicate that GPS2 regulates mitochondrial-associated translation by  
314 inhibiting the ubiquitination of the RNA binding protein PABPC1 and other translation factors by  
315 the mitochondrial E3 ubiquitin ligase Mul1. To our surprise, our data point to the mitochondria-  
316 specific Mul1 as the E3 ligase regulating PABPC1 ubiquitination both *in vivo* and *in vitro*, rather  
317 than MKRN1, which had been previously associated with the ubiquitination of PABPC1 in  
318 HEK293T<sup>54</sup>. Mul1 is a dual function E3 ligase promoting either the ubiquitination or SUMOylation  
319 of mitochondrial targets<sup>63,64</sup>. Previous studies have described an important role for Mul1 in  
320 regulating a variety of physiological and pathological processes, including mitochondrial  
321 dynamics, cell growth, apoptosis, and mitophagy<sup>65–69</sup>. Our study adds to this body of work by  
322 showing that Mul1-mediated ubiquitination regulates the activity of translation factors localized to  
323 the OMM and restricts the local translation of a subset of nuclear-encoded mitochondrial proteins.  
324 One intriguing aspect of Mul1 involvement in regulating mitochondria-associated translation is

325 that it is uniquely suited for playing a key role in the mitochondrial stress response (MSR).  
326 Because of its spatial organization, Mul1 can in fact sense mitochondrial stress in the  
327 intermembrane mitochondrial space and respond through the ubiquitination of specific substrates  
328 on the outer mitochondrial surface<sup>68-70</sup>. Our data support this possibility as we observed increased  
329 ubiquitination of PABPC1 upon mitochondrial depolarization, concomitant to GPS2 retrograde  
330 translocation to the nucleus.

331  
332 The relationship between GPS2 and Mul1 in mitochondria appears quite complex. Mul1 was  
333 previously shown to regulate the sumoylation of GPS2, as required for regulating GPS2  
334 intracellular localization and translocation in stress conditions<sup>9</sup>. At the same time, results  
335 presented here indicate that GPS2 inhibits Ubc13/Mul1-mediated ubiquitination of PABPC1, likely  
336 through inhibition of Ubc13 activity. Together, these observations suggest a complex regulatory  
337 strategy for modulating mitochondrial adaptation to stress which includes: 1) Mul1-mediated  
338 sumoylation of GPS2 is removed by SENP1; 2) desumoylation favors GPS2 translocation to the  
339 nucleus where it promotes the transcription of stress response and nuclear-encoded  
340 mitochondrial genes; 3) at the same time the absence of GPS2 in mitochondria licenses  
341 Mul1/Ubc13 activity on mitochondria-associated translation factors, in turn enhancing the  
342 translation of antioxidant proteins to promote adaptation to the mitochondrial stress.

343  
344 While we have mainly focused on PABPC1 as a key target of GPS2-regulated ubiquitination in  
345 this study, our proteomics data suggest that PABPC1 is not the only target relevant to the  
346 regulation of mitochondrial-associated translation. Ribosomes are known to be regulated by non-  
347 proteolytic ubiquitination as well, and ribosomal subunit RPS11 and scaffold factor RACK1<sup>71-73</sup>.  
348 In addition, we identified Eif3m, a translation initiation factor, as a target of GPS2-regulated K63  
349 ubiquitination and GPS2. These results suggest that regulation of mitochondrial-associated  
350 translation is achieved by the concomitant ubiquitination of multiple factors working together.

351 Further studies will be required to dissect the specific sites of ubiquitination and the contribution  
352 of individual PTM events.

353

354 In conclusion, our work indicates that GPS2 plays an important role in mitochondrial regulation  
355 by inhibiting ubiquitin signaling. Together with the recent characterization of GPS2-mediated  
356 regulation of nuclear-encoded mitochondrial genes transcription, our results add to the  
357 significance of the GPS2 role in integrating multiple layers regulating cell growth, metabolism, and  
358 stress resistance.

359

360

#### 361 **ACKNOWLEDGMENTS**

362 We thank all past and present members of the Perissi Lab for their continuous support and  
363 encouragement. We are grateful to Drs. Christine Vogel and Gustavo Silva for their assistance  
364 with protocols for the enrichment of K63 ubiquitinated proteins. Genomic profiling experiments  
365 have been run by the Boston University Microarray & Sequencing Resource Core. This work was  
366 supported by NIH and Department of Defense grant awards as follows: NIGMS R01GM127625  
367 to VP, DoD W81XWH-17-1-0048 to VP, R00GM124458 to SML

368

369

370

## 371 ***Materials and Methods***

### 372 **Reagents and antibodies**

373 Anti-GPS2 antibody was generated in rabbit against a peptide representing aa 307-327.  
374 Commercial antibodies used were as follows: anti-ubiquitin (P4D1 clone, Cell Signaling  
375 Technology), anti- $\beta$ -tubulin (TUB 2.1 clone, Sigma), anti-HDAC2 (ab16032, Abcam), anti-  
376 mtHSP70 (catalog no. MA3-028, Invitrogen), anti-K63 (catalog no. 05-1308, Millipore), anti- $\alpha$ -  
377 Tubulin (catalog no. T5168, Sigma), anti-GAPDH (catalog no. MA5-15738, Invitrogen), anti-  
378 PABPC1 (ab21060, Abcam), anti-RPS11(NBP2-22289, Novus Biologicals), anti-Rack1 (sc-  
379 17754, Santa Cruz Biotechnology), anti-Eif4G (15704-1-AP, Proteintech), anti-Paip1 (sc-365687,  
380 Santa Cruz Biotechnology), anti-Paip2 (15583-1-AP, proteintech), anti-Flag-HRP (catalog no.  
381 a8592, Sigma), anti-Puromycin (clone 12D10, Millipore), anti-PDHA (ab168379, Abcam), anti-  
382 Oxphos (ab110413, Abcam), anti-SOD2 (sc-137254, Santa Cruz Biotechnology). siRNAs against  
383 mouse GPS2, UBC13, MKRN1, MUL1, and UBC9 were purchased from Ambion. Nonspecific  
384 scrambled siRNA was included as negative controls in each experiment.

### 385 **Cell culture**

386 Standard molecular cloning, cell culture, and cell transfection experiments were performed as  
387 described by J. Sambrook, D. W. Russell, Molecular Cloning: A Laboratory Manual (Cold Spring  
388 Harbor Laboratory Press, Cold Spring Harbor, N.Y., ed. 3rd, 2001). For cells transfection,  
389 jetPRIME was used following the manufacturer's protocol (Polyplus transfection). Immunostaining  
390 was performed following standard protocols on cells fixed in 4% paraformaldehyde in PBS, using  
391 Alexa Fluor-conjugated secondary antibodies (Molecular probes).  
392 Mouse embryonic fibroblasts (MEFs) cells were maintained in DMEM with 4.5 g/L glucose and L-  
393 glutamine and 10% FBS at 37°C and 5% CO<sub>2</sub>. Conditional Gps2<sup>fllox/fllox</sup> mice were generated by



394 inGenious Targeting Laboratory. Wild-type mice used as control for all analyses presented here  
395 were littermates  $Gps2^{flox/flox}/CD19Cre^{-}$ .  
396 MDA-MB-231 breast cancer cells were grown in DMEM with 4.5 g/L glucose and L-glutamine and  
397 10% FBS at 37°C and 5% CO<sub>2</sub>. MB231 GPS2 KO cells were generated and described  
398 previously<sup>47</sup>.

### 399 Protein extraction, subcellular fractionation, immunoprecipitation and western blotting

400 For whole cell extraction, cultured cells were pelleted and incubated for 20 minutes on ice in IPH  
401 buffer (50 mM Tris HCl [pH 8.0], 250 mM NaCl, 5 mM EDTA, 0.5% NP-40, 0.1mM PMSF, 2mM  
402 Na<sub>3</sub>VO<sub>4</sub>, 50mM NaF, and 1X protease inhibitors (Sigma Aldrich)). For cytoplasmic,  
403 mitochondrial and nuclear extracts fractionation, cells were pelleted and resuspended in gradient  
404 buffer (10 mM HEPES [pH 7.9], 1mM EDTA, 210 mM Mannitol, 70mM Sucrose, 10mM NEM, 50  
405 mM NaF, 2 mM Na<sub>2</sub>VO<sub>3</sub>, 1mM PMSF and 1x protease inhibitor mixture), then homogenized by  
406 syringe followed by low-speed centrifugation for 10 min. The supernatant containing cytosolic  
407 proteins was recovered and subjected to high-speed centrifugation to separate the mitochondrial  
408 pellet from the cytoplasmic fraction, and the nuclear pellet was lysed for 20 min in high-salt buffer  
409 (20 mM Tris-HCL [pH 8.0], 25% glycerol, 420 mM NaCl, 1.5 mM MgCl<sub>2</sub>, 0.2 mM EDTA, 0.5 mM  
410 DTT, 10mM NEM, 50 mM NaF, 2 mM Na<sub>3</sub>VO<sub>4</sub>, 1mM PMSF and protease inhibitor mixture). The  
411 mitochondrial pellet was incubated for 15 min in lysis buffer (50 mM Tris/HCl [pH 8.0], 300 mM  
412 NaCl, 1mM EDTA, 1% Triton X-100, 10mM NEM, 50 mM NaF, 2 mM Na<sub>2</sub>VO<sub>3</sub>, 1mM PMSF and  
413 protease inhibitor mixture). The concentration of protein extracts was measured using the  
414 Bradford assay (Bio-Rad). Extracts were boiled in SDS sample buffer and loaded directly on  
415 precast Bio-Rad gels. For immunoprecipitation, protein extracts were incubated with the specific  
416 antibody overnight at 4 °C after adjusting the buffer to a final concentration of 150 mM NaCl and  
417 0.5% NP-40 and then incubated for 1 h with Protein A-Sepharose™ 4B (Invitrogen), washed

418 extensively, separated by electrophoresis, transferred onto PVDF membranes (Millipore), and  
419 subjected to Western blotting following standard protocols.

#### 420 Recombinant Protein Expression

421 cDNAs encoding the tandem ubiquitin-binding entity (Vx3K0 and Rx3(A7)) (Sims J., 2012, Nature  
422 protocol) were subcloned into pET28a-His-tag expression vector. Human clone of GPS2 and  
423 mouse clone of PABPC1 and mutated PABPC1 (with four lysine mutations: K78R, K188R, K284R  
424 and K512R) were subcloned into pET-32a-His-tag expression vectors. His-tagged Vx3K0,  
425 Rx3(A7), GPS2 and PABPC1 were produced as a His-tag fusion protein in BL21 *Escherichia coli*,  
426 resin-purified on nickel-nitrilotriacetic acid beads, and eluted accordingly to manufacturer's  
427 protocol (Life Technologies). The His-Vx3K0/Rx3(A7)-conjugated agarose were stored at 4°C in  
428 PBS supplemented with 30% glycine.

#### 429 Immunochemical methods

430 For pull-down of K63-ubiquitylated proteins, cells were lysed in high-stringency buffer (50 mM  
431 Tris, pH 7.5; 500 mM NaCl; 5 mM EDTA; 1% NP40; 1 mM dithiothreitol (DTT); 0.1% SDS)  
432 containing 1.25 mg ml<sup>-1</sup> N-ethylmaleimide, 0.1% PMSF, and protease inhibitor cocktail (Roche).  
433 His-Vx3K0/Rx3(A7) were added to immobilize the K63-ubiquitylated proteins, and bound material  
434 was washed extensively in high-stringency buffer four times. Proteins were resolved by SDS-  
435 APGE and analyzed by immunoblotting.

#### 436 In vitro ubiquitination assay

437 Ubiquitination assays were carried out at 30°C for 2h in 50mM Tris-HCl, pH7.6, containing 50mM  
438 NaCl, 5mM MgCl<sub>2</sub>, 5mM ATP, 1x Ubiquitin Aldheide, 50nM E1, 5µg ubiquitin, 200 nM Ubch13–  
439 Uev1a E2 complexes (Boston Biochem), 0.1ug recombinant human MUL1 Protein (H00079594-

440 P01, Novus Biologicals). Bacterial expressed His-PABPC1/mutated PABPC1 was used as  
441 substrate.

#### 442 **Mitochondrial RNA Isolation and RNA-seq**

443 Mitochondrial RNA was isolated from isolated mitochondrial pellet following the manufacturer  
444 protocol for the RNeasy Kit (QIAGEN). Isolated mitochondrial RNA was subjected to quality  
445 control on Agilent Bioanalyzer and RNA library preparation following Illumina's RNA-seq Sample  
446 Preparation Protocol. Resulting cDNA libraries were sequenced on the Illumina's HiSeq 2000.

#### 447 **Mitochondrial Content**

448 Total DNA was extracted from cells using QuickExtract DNA Extraction Solution 1.0 (Epicenter)  
449 following manufacturer's instructions. DNA amplification of the mitochondrial-encoded NADH  
450 dehydrogenase 1 (mt-ND1) relative to nuclear TFAM was used to determine mitochondrial DNA  
451 copy number.

#### 452 **Translation activity**

453 Puromycin incorporation into newly synthesized proteins was performed to measure translation  
454 activity. MEFs WT and GPS2-KO cells were treated in the presence or absence of  
455 homoharringtonine (HHT) (5  $\mu$ M, Tocris Bioscience) for 10 min to prevent new translation  
456 initiation, prior to an additional 5 min incubation with puromycin (100  $\mu$ M, Sigma) and emetine  
457 (200  $\mu$ M, Sigma) at 37°C. Cells were collected by centrifugation, and lysate was prepared as  
458 described above. Thirty micrograms of protein were loaded onto a 10% SDS-PAGE gel for  
459 immunoblotting analysis.

## 460 Sample preparation for MS analysis

461 For mitochondrial proteome profiling, mitochondrial proteins from MEFs WT and GPS2-KO cells  
462 were isolated as described before<sup>9</sup>. An equal amount of solubilized mitochondrial proteins from  
463 different samples were separated by SDS-PAGE and then digested in-gel by trypsin overnight  
464 using standard methods<sup>74</sup>.

465 For SILAC-K63 experiments, MEFs WT and GPS2-KO cells or MDA-MB231 WT and GPS2-KO  
466 cells were grown in medium containing native (unlabeled) L-arginine and L-lysine (Arg0/Lys0) as  
467 the light condition, or stable isotope-labelled variants of L-arginine and L-lysine (Arg10/Lys8) as  
468 the heavy condition<sup>75</sup>. Proteins from whole cellular lysates were extracted from SILAC-labelled  
469 MEFs WT and GPS2-KO cells or MDA-MB-231WT and GPS2-KO cells as described before. An  
470 equal amount of proteins from the two SILAC states was mixed and precipitated by His-Vx3K0-  
471 conjugated agarose and incubating at 4°C for 1h. Precipitated proteins were eluted with SDS  
472 sample buffer, incubated with 10 mM DTT for 10min at 100 °C. Proteins were separated by SDS-  
473 PAGE and then digested in-gel by trypsin overnight using standard methods. The resulting  
474 peptides were desalted using reverse phase (C18) Tips (Thermo Scientific) per the  
475 manufacturer's instructions.

476 For TMT based-K63 experiments, MEFs WT and GPS2-KO cells were grown in normal medium  
477 to 80% confluency. After lysis with IPH buffer, protein quantities from whole cellular lysates were  
478 determined using the Bradford assay. An equal amount of proteins from MEFs WT or GPS2-KO  
479 cells was precipitated by His-Vx3K0-conjugated agarose and incubating at 4°C for 1h.  
480 Precipitated proteins were eluted with SDS sample buffer, incubated with 10 mM DTT for 10min  
481 at 100 °C. Proteins were separated by SDS-PAGE and then digested in-gel by trypsin overnight  
482 using standard methods. The resulting peptides were desalted using C18 Tips (Thermo Scientific)  
483 per the manufacturer's instructions and vacuum-dried. The dried peptides were redissolved in 0.5  
484 M TEAB, and processed independently according to the manufacturer's protocol for a 10-plex

485 Tandem Mass Tag (TMT) reagent labeling kit (Thermo Fisher Scientific). The different TMT-  
486 labeled peptide mixtures were pooled equally, desalted and dried by vacuum centrifugation.

#### 487 Mass spectrometric analysis

488 Peptides were analyzed on a Q-Exactive HF mass spectrometer (QE-HF, Thermo Fisher  
489 Scientific) equipped with a nanoflow EasyLC1200 HPLC system (Thermo Fisher Scientific).  
490 Peptides were loaded onto a C18 trap column (3  $\mu\text{m}$ , 75  $\mu\text{m}$   $\times$  2 cm, Thermo Fisher Scientific)  
491 connected in-line to a C18 analytical column (2  $\mu\text{m}$ , 75  $\mu\text{m}$   $\times$  50 cm, Thermo EasySpray) using  
492 the Thermo EasyLC 1200 system with the column oven set to 55  $^{\circ}\text{C}$ . The nanoflow gradient  
493 consisted of buffer A (composed of 2% (v/v) ACN with 0.1% formic acid) and buffer B (consisting  
494 of 80% (v/v) ACN with 0.1% formic acid). For protein analysis, nLC was performed for 180 min at  
495 a flow rate of 250 nL/min, with a gradient of 2-8% B for 5 min, followed by a 8-20% B for 96 min,  
496 a 20-35% gradient for 56min, and a 35-98% B gradient for 3 min, 98% buffer B for 3 min, 100-0%  
497 gradient of B for 3 min, and finishing with 5% B for 14 min. Peptides were directly ionized using a  
498 nanospray ion source and analyzed on the Q-Exactive HF mass spectrometer (Thermo Fisher  
499 Scientific).

500 QE-HF was run using data dependent MS2 scan mode, with the top 10 most intense precursor  
501 ions acquired per profile mode full-scan precursor mass spectrum subject to HCD fragmentation.  
502 Full MS spectra were collected at a resolution of 120,000 with an AGC of 3e6 or maximum  
503 injection time of 60 ms and a scan range of 350 to 1650 m/z, while the MS2 scans were performed  
504 at 45,000 resolution, with an ion-packet setting of 2e4 for AGC, maximum injection time of 90 ms,  
505 and using 33% NCE. Source ionization parameters were optimized with the spray voltage at 2.1  
506 kV, transfer temperature at 275  $^{\circ}\text{C}$ . Dynamic exclusion was set to 40 seconds.

507 **Data analysis**

508 All acquired MS/MS spectra were searched against the Uniprot mouse complete proteome  
509 FASTA database released on 2013\_07\_01, using the MaxQuant software (Version 1.6.7.0) that  
510 integrates the Andromeda search engine. Enzyme specificity was set to trypsin and up to two  
511 missed cleavages were allowed. Cysteine carbamidomethylation was specified as a fixed  
512 modification. Methionine oxidation, N-terminal acetylation, and lysine ubiquitination were included  
513 as variable modifications. Peptide precursor ions were searched with a maximum mass deviation  
514 of 6 ppm and fragment ions with a maximum mass deviation of 20 ppm. Peptide and protein  
515 identifications were filtered at 1% FDR using the target-decoy database search strategy. Proteins  
516 that could not be differentiated based on MS/MS spectra alone were grouped to protein groups  
517 (default MaxQuant settings). For mitochondrial protein annotation, we utilized the latest Mitocarta  
518 dataset([https://www.broadinstitute.org/files/shared/metabolism/mitocarta/human.mitocarta3.0.ht](https://www.broadinstitute.org/files/shared/metabolism/mitocarta/human.mitocarta3.0.html)  
519 ml).

520 **Statistical analysis**

521 The statistical data are from three independent experiments. Results are shown as mean  $\pm$  SEM  
522 unless mentioned otherwise. Statistical analysis was performed by the Student's t-test for TMT-  
523 based quantification and RNA-seq data.

524

525

526

527 **FIGURE LEGENDS**

528

529 **Figure 1 - Mitochondrial proteome of GPS2 WT and KO MEFs**

530

531 A, Heatmap showing 137 significantly changed mitochondrial proteins induced by GPS2-  
532 deficiency from GPS2 WT and KO MEFs. Enriched biological process GO terms of significantly  
533 downregulated (blue, upper panels) or upregulated (red, down panels) in response to GPS2  
534 deficiency.

535 B, Western blot analysis of SOD2, PDRX2, and FASN normalized to GAPDH in mitochondrial  
536 extracts from WT versus GPS2 KO MEFs.

537 C&D, Distribution of 137 significantly changed mitochondrial proteins based on LC-MS/MS  
538 analysis and RNA-seq (C) or previously generated GRO-seq in 3T3-L1 cells<sup>9</sup>. Red, upregulated  
539 proteins identified through RNA-seq and proteomics; Blue, upregulated proteins identified through  
540 proteomics, but downregulated in RNA-seq; Black, downregulated proteins identified through  
541 proteomics.

542

543 **Figure 2 - K63 ubiquitome profiling of GPS2 WT and KO MEFs by LC-MS/MS**

544 A, Increased K63 ubiquitination in mitochondria extract in GPS2 KO compared to WT by western  
545 blot.

546 B, SILAC-based K63 proteomic profiling of GPS2 WT and KO MEFs.

547 C, Gene ontology analysis of 46 putative K63 ubiquitinated proteins whose ubiquitination is  
548 mediated by GPS2.

549 D, Detection of K63 ubiquitination of RPS11 and RACK1 purified by specific K63-ubiquitin binding  
550 domain Vx3K0 by IP/WB using both whole-cell extracts and fractionated mitochondrial extracts in  
551 GPS2 WT and KO MEFs.

552 E, Puromycin labeling of *de novo* protein synthesis on different fractionated extracts pretreated  
553 w/o homoharringtonine (HHT). ME, mitochondrial extract; CE, cytosol extract; NE, nuclear extract;  
554 WCL, whole cell extract. Cells were treated with HHT for 10 min prior to treatment with 0.9mM  
555 puromycin for additional 5 min. Anti-GAPDH/B-Tub/HDAC2 blot was used as loading control for  
556 different fractions.

557

558 **Figure 3 - PABPC1 ubiquitination is mediated by Mul1 on mitochondria.**

559 A, Detection of K63 ubiquitination of PABPC1 purified by specific K63-ubiquitin binding domain  
560 Vx3K0 by IP/WB using both whole cell extracts and fractionated mitochondrial extracts in GPS2  
561 WT and KO MEFs.

562 B, Detection of K63 ubiquitination by IP/WB of PABPC1 in mitochondria extracts in GPS2 WT,  
563 KO and KO treatment with UBC13 inhibitor MEFs.

564 C, FCCP-induced ubiquitination of PABPC1 is mediated by mitochondria specific E3 ligase MUL1.

565 D, PABPC1 is polyubiquitinated by the E3 ubiquitin ligase MUL1 by *in vitro* ubiquitination assay.

566 E, Polyubiquitination on PABPC1 mediated by E3 ubiquitina ligase MUL1 is significantly inhibited  
567 by GPS2 in *in vitro* ubiquitination assay.

568 F, WB analysis of binding of PABPC1 with EIF4G, PAIP1 and PAIP2 on mitochondrial extracts  
569 from GPS2 WT and KO MEFs.

570 G, WB analysis of binding of PABPC1 with PAIP1 and PAIP2 on mitochondrial extracts from  
571 GPS2 WT, KO and KO knockdown MUL1 (siMul1) MEFs.

572 H, Puromycin labeling of *de novo* protein synthesis on mitochondrial extracts from GPS2 WT, KO  
573 and KO knockdown MUL1 (siMul1) MEFs. Anti-GAPDH blot was used as loading control.

574

575 **Figure 4 - K63 ubiquitination-mediated regulation of mitochondrial-associated translation**  
576 **in stress response**



577 A, WB of fractionated extracts showing mitochondria-to-nucleus translocation of GPS2 in MEFs  
578 cells upon FCCP treatment.

579 B, Detection of K63 ubiquitination by IP/WB of PABPC1 in mitochondria extracts in MEFs cells  
580 upon FCCP treatment.

581 C, Detection of K63 ubiquitination of PABPC1 purified by specific K63-ubiquitin binding domain  
582 Vx3K0 by IP/WB in mitochondria extracts in MEFs cells upon FCCP treatment.

583 D, WB analysis of binding of PABPC1 with PAIP1 and PAIP2 in mitochondria extracts in MEFs  
584 cells upon FCCP treatment.

585 E, Heatmap showing significantly changed mitochondrial proteins in GPS2 WT, KO MEFs and  
586 WT cells treated with FCCP for 3h and 12h .

587 F, Western blot analysis of SOD2 normalized to GAPDH in mitochondrial extracts in MEFs cells  
588 upon FCCP treatment.

589

590

#### 591 **Supplemental Figure 1, Related to Figure 1**

592 A, Western blot analysis of GPS2 expression in GPS2 WT and KO MEFs cells. Anti- $\alpha$ -Tub blot  
593 was used as loading control.

594 B, Mitochondrial DNA content in WT and GPS2 KO MEFs cells. \*\*indicate p-value<0.01.

595 C, Gene ontology analysis of 891 differentially expressed proteins induced by GPS2-deficiency  
596 from GPS2 WT and KO MEFs.

597

#### 598 **Supplemental Figure 2, Related to Figure 2**

599 A, Comparison of the binding affinity of Vx3K0 and Rx3 to different type and length ubiquitin  
600 chains.

601 B, WB analysis of K63 ubiquitinated proteins captured by Vx3K0 from whole cell extracts in GPS2  
602 WT and KO MEFs.

603 C, Scatter plotting analysis of SILAC data obtained from two independent SILAC-K63 ubiquitome  
604 experiments. The KO/WT SILAC ratio of two labeled samples were converted to log2 scale for  
605 analysis. The proteins identified by SILAC-K63 ubiquitome and their SILAC ratios are listed in  
606 supplemental Table 3.

607 D, TMT labeling-based K63 proteomic profiling of GPS2 WT and KO MEFs. Each sample  
608 (WT/KO) has 3 replicates for LC-MS/MS analysis.

609 E, Gene ontology analysis of 22 putative K63 ubiquitinated proteins whose ubiquitination are  
610 mediated by GPS2 identified in MB231.

611

### 612 **Supplemental Figure 3, Related to Figure 2**

613 A, Venn diagram comparing identified putative K63 ubiquitinated proteins whose ubiquitination  
614 are mediated by GPS2 from MEFs SILAC, MEFs TmT and MDA-MB231 SILAC datasets.

615 B, Detection of K63 ubiquitination of eif3M purified by specific K63-ubiquitin binding domain  
616 Vx3K0 by IP/WB using fractionated mitochondrial extracts in GPS2 WT, KO and KO knockdown  
617 Mulan (siMul1) MEFs.

618

619

620

621

622

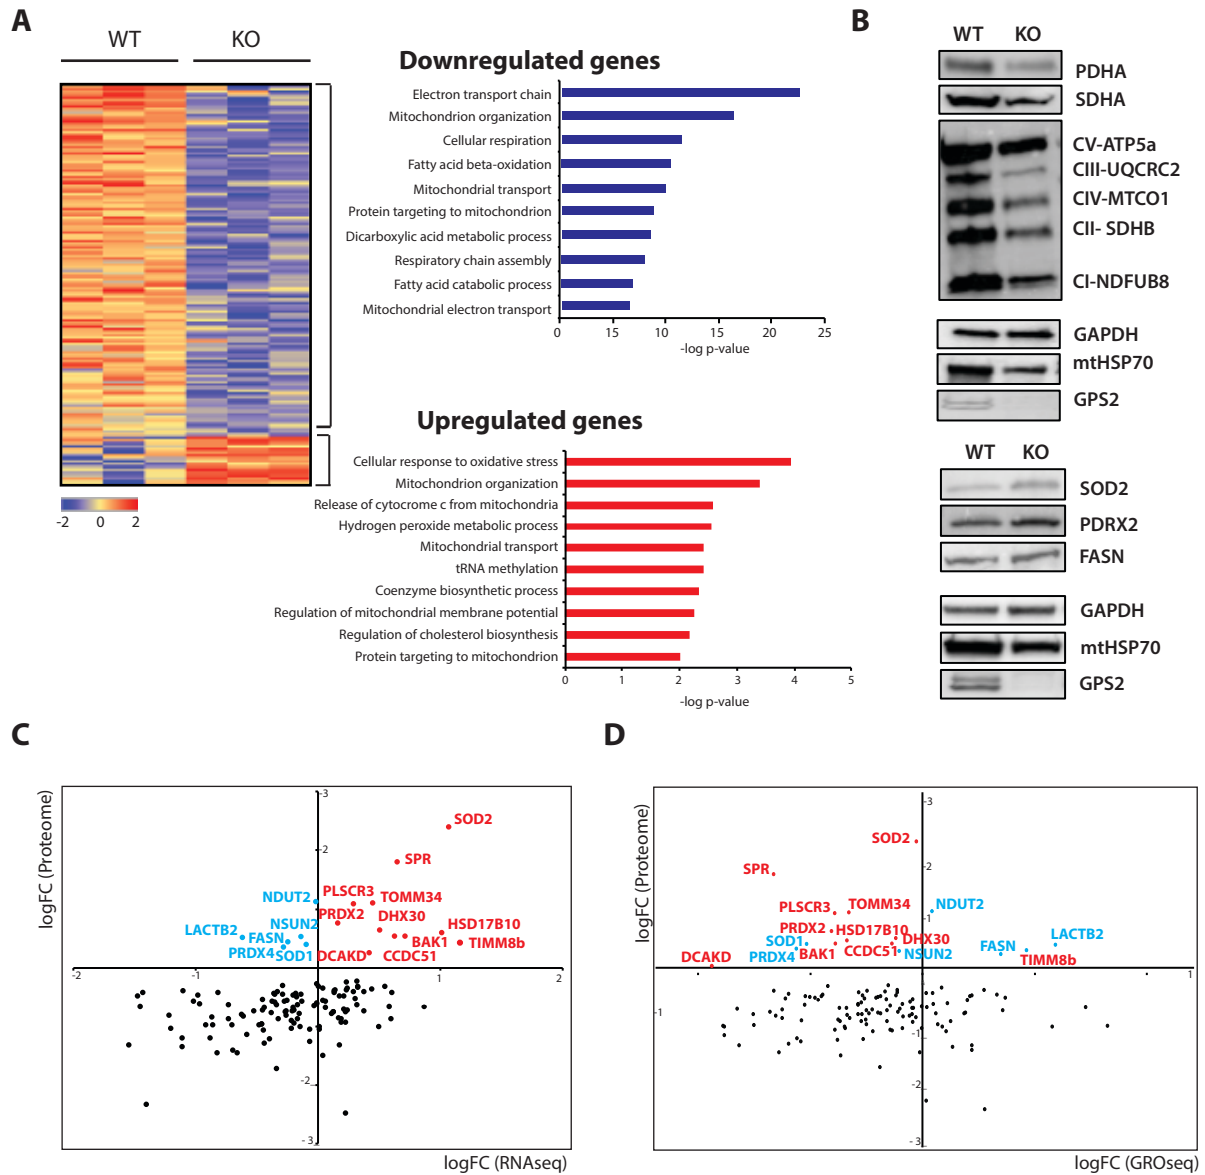

Figure 1

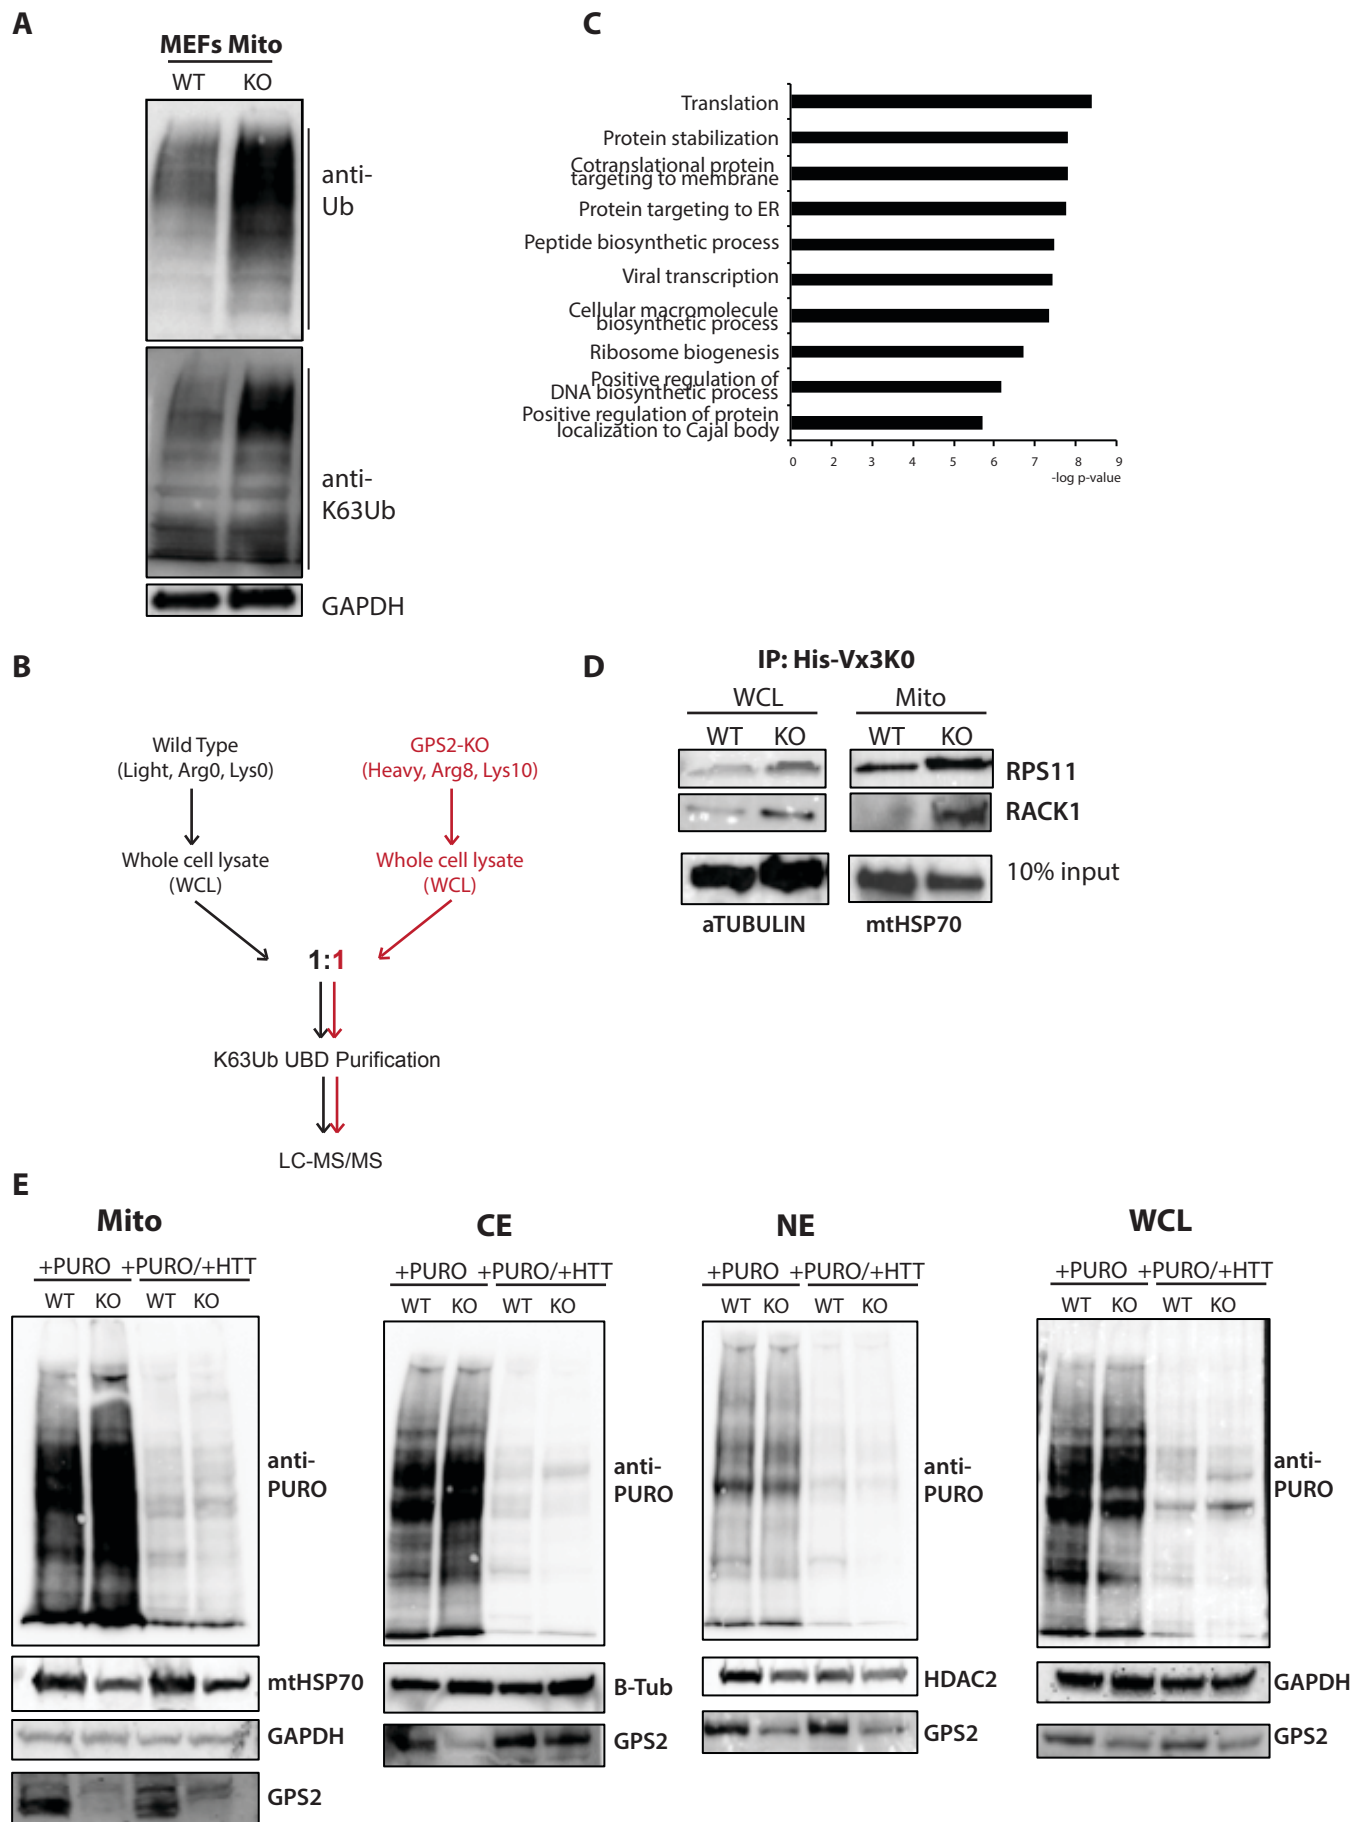

**Figure 2**  
Gao et al., 2021

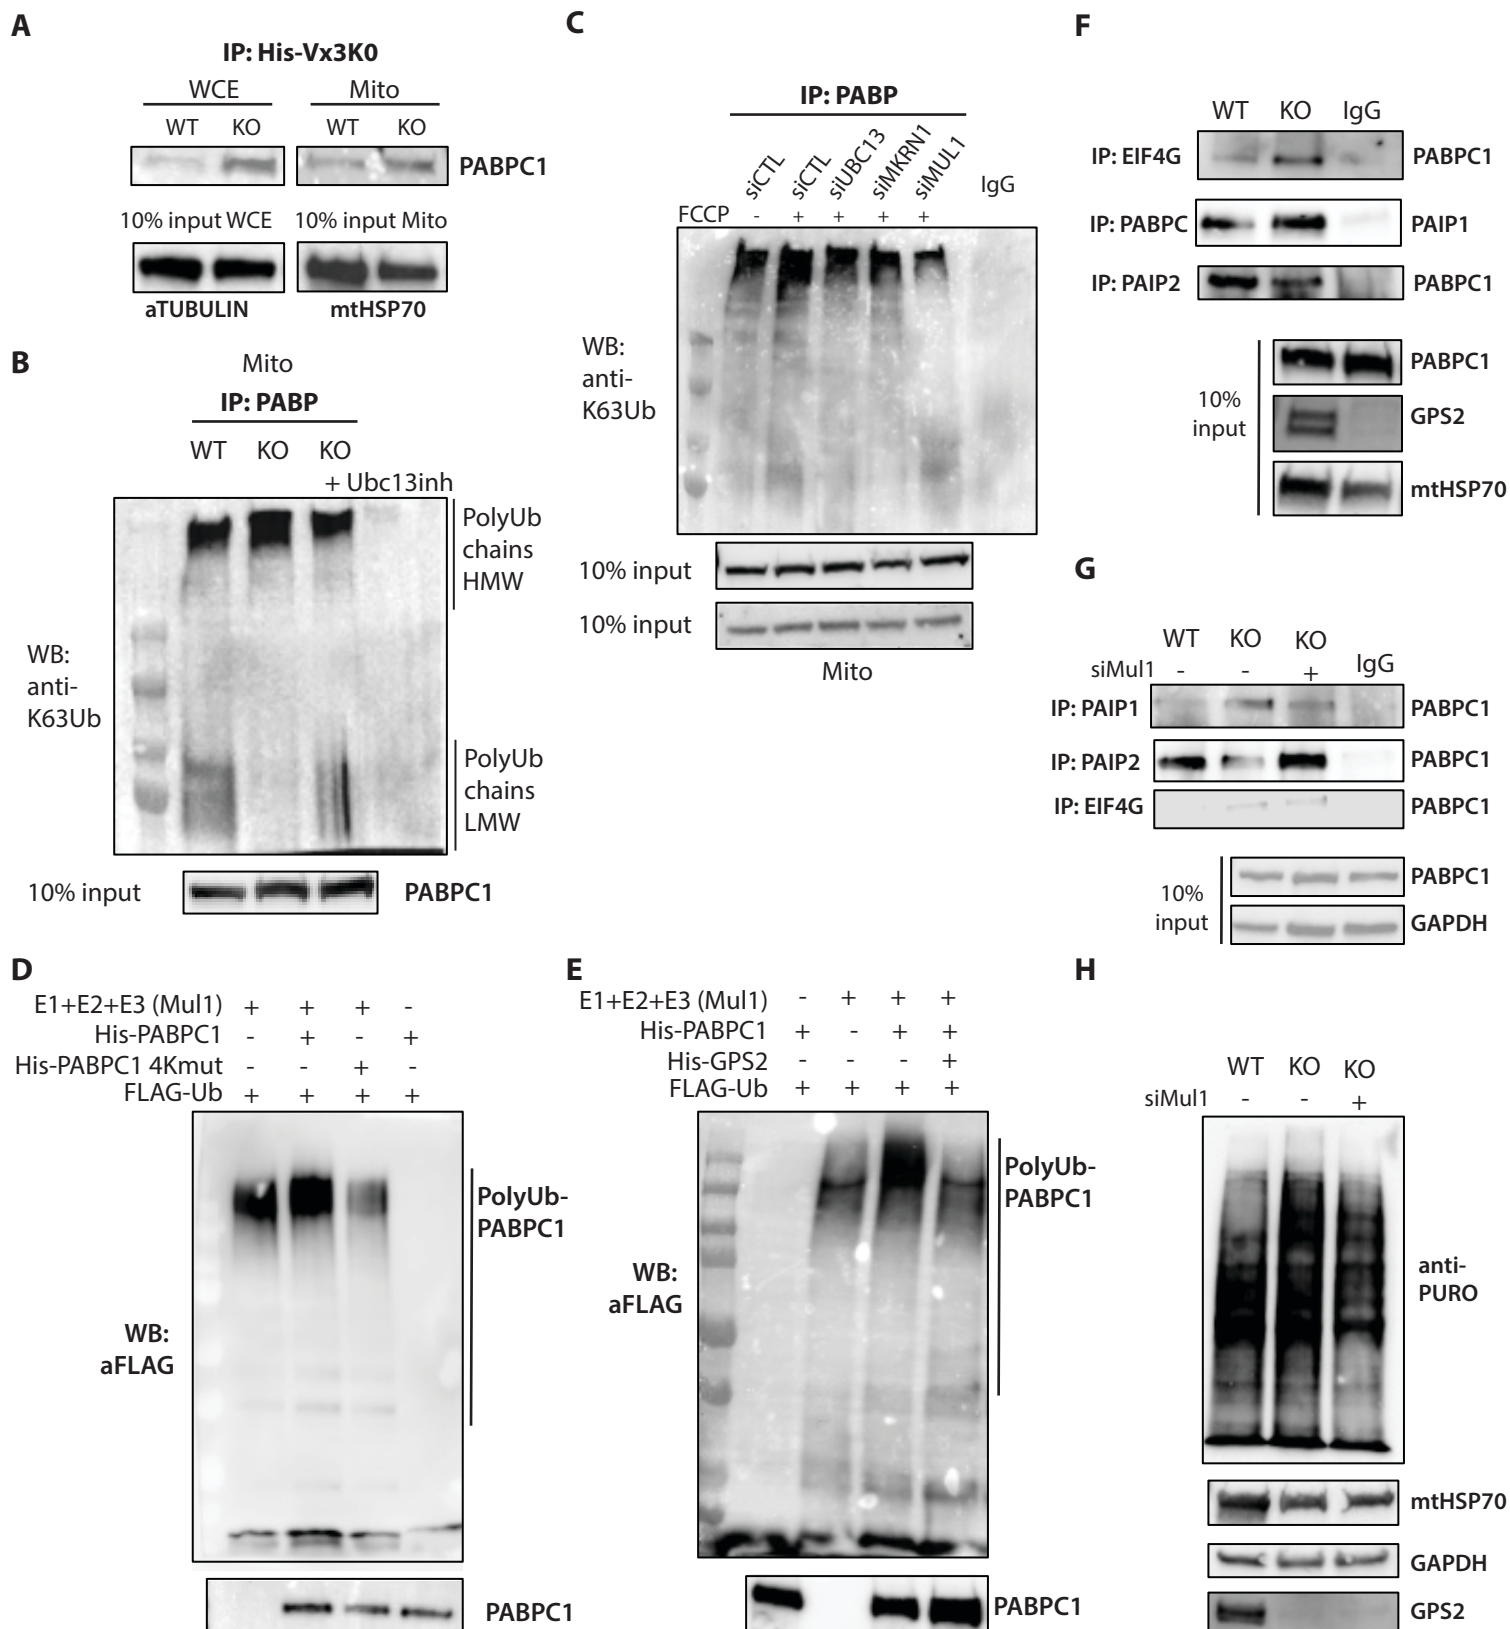

**Figure 3**  
Gao et al., 2021

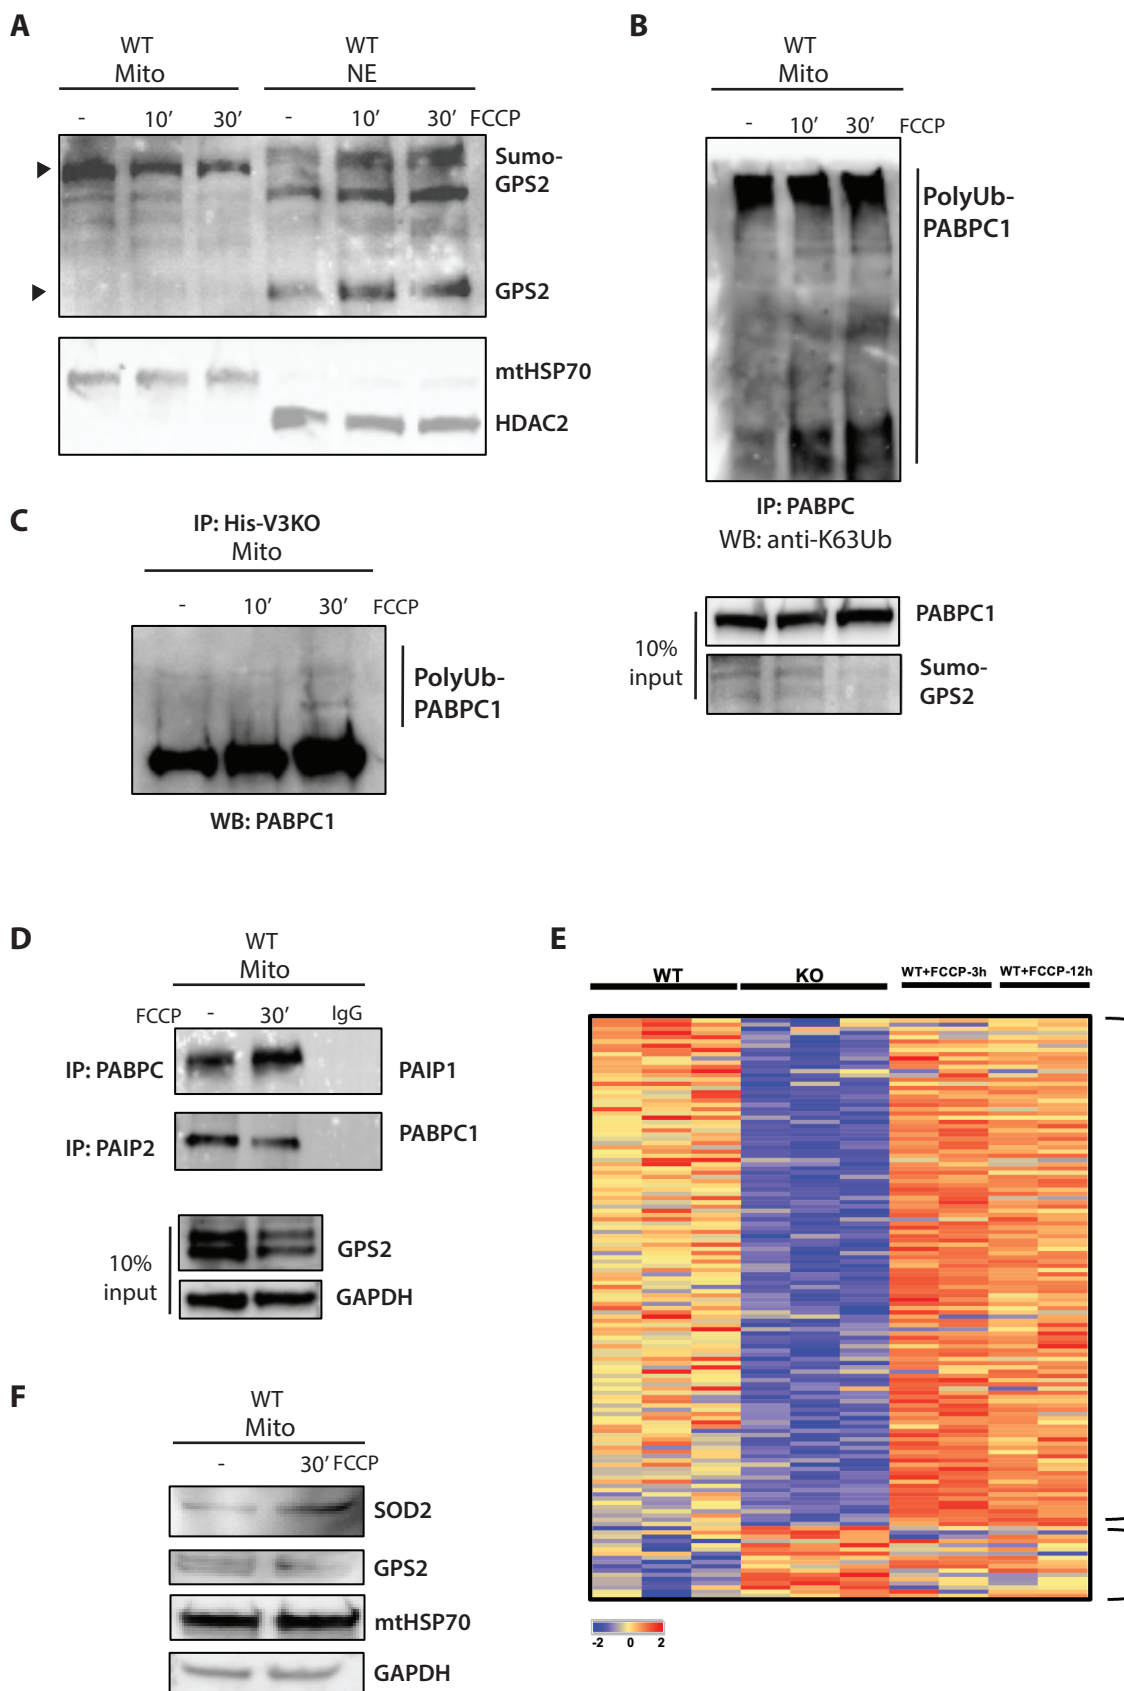

**Figure 4**  
Gao et al., 2021
